# Supplementary material
Source: ML conference proceedings conference paper supplement (https://openreview.net/forum?id=LhFnafBlv5)
Supplement: supplementary_material [file Appendix_TIF.pdf › Appendix_TIF.pdf]

## A LLM USAGE STATEMENT

Large language models were used solely as general-purpose writing assistance tools to aid in polishing the manuscript text and improving clarity of expression. LLMs did not contribute to research ideation, methodology development, experimental design, data analysis, or the generation of scientific insights presented in this work.

## B DATASET DETAILS

We conduct extensive experiments on several widely-used time series datasets for multivariate long-term and short-term time series forecasting. We report the dataset statistics as shown in [Tab. A1](#). More details can be found in [Tab. A2](#):

Table A1: **Dataset statistics**

| Task       | Dataset     | Variable | Split Size | Frequency | ADF <sup>†</sup> | EG <sup>‡</sup> |
|------------|-------------|----------|------------|-----------|------------------|-----------------|
| Long-term  | ETTm1       | 7        | 6:2:2      | 15 min    | −14.98           | 20              |
|            | ETTm2       | 7        | 6:2:2      | 15 min    | −5.66            | 17              |
|            | ETTh1       | 7        | 6:2:2      | 1 hour    | −5.91            | 11              |
|            | ETTh2       | 7        | 6:2:2      | 1 hour    | −4.13            | 10              |
|            | Electricity | 321      | 7:1:2      | 1 hour    | −8.44            | 39,567          |
|            | Traffic     | 862      | 7:1:2      | 1 hour    | −15.02           | 35,4627         |
|            | Weather     | 21       | 7:1:2      | 10 min    | −26.68           | 77              |
|            | Solar       | 137      | 6:2:2      | 10 min    | −37.23           | 8373            |
| Short-term | PeMS03      | 358      | 6:2:2      | 5 min     | −19.05           | −               |
|            | PeMS04      | 307      | 6:2:2      | 5 min     | −15.66           | −               |
|            | PeMS07      | 883      | 6:2:2      | 5 min     | −20.60           | −               |
|            | PeMS08      | 170      | 6:2:2      | 5 min     | −16.04           | −               |

<sup>†</sup> Augmented Dickey-Fuller (ADF) Test: The larger ADF test result indicates that the time series exhibits stronger non-stationarity.

<sup>‡</sup> Engle-Granger (EG) Test: The larger EG test result indicates that the time series data exhibits stronger cross-variable correlation.

Table A2: **Dataset description.**

| Dataset     | Description                                                                            |
|-------------|----------------------------------------------------------------------------------------|
| ETT         | Power transformer, comprising seven indicators such as oil temperature and useful load |
| Weather     | Recorded every for the whole year 2020, which contains 21 meteorological indicators    |
| Electricity | Electricity consumption in kWh every 1 hour from 2012 to 2014                          |
| Traffic     | Road occupancy rates measured by 862 sensors on San Francisco Bay area freeways        |
| PeMS        | Traffic flow time series collected from the CalTrans PeMS                              |

## C HYPERPARAMETER SETTINGS

Table A3: **The results on the traffic dataset with varying lookback window  $L = 96, 192, 336, 512, 720$  and forecast horizon  $H = 96, 192, 336, 720$ .**

| Lookback |      | 96    |       | 192   |       | 336   |              | 512          |              | 720          |              |
|----------|------|-------|-------|-------|-------|-------|--------------|--------------|--------------|--------------|--------------|
| Metric   |      | MSE   | MAE   | MSE   | MAE   | MSE   | MAE          | MSE          | MAE          | MSE          | MAE          |
| Traffic  | 96   | 0.392 | 0.235 | 0.351 | 0.220 | 0.344 | 0.217        | <b>0.337</b> | <b>0.216</b> | <b>0.328</b> | <b>0.213</b> |
|          | 192  | 0.417 | 0.247 | 0.384 | 0.233 | 0.370 | <b>0.229</b> | <b>0.360</b> | <b>0.226</b> | <b>0.355</b> | <b>0.226</b> |
|          | 336  | 0.438 | 0.255 | 0.406 | 0.243 | 0.387 | 0.237        | <b>0.376</b> | <b>0.234</b> | <b>0.378</b> | <b>0.236</b> |
|          | 720  | 0.475 | 0.275 | 0.443 | 0.264 | 0.429 | 0.260        | <b>0.425</b> | <b>0.259</b> | <b>0.419</b> | <b>0.256</b> |
|          | Avg. | 0.431 | 0.253 | 0.396 | 0.240 | 0.383 | 0.236        | <b>0.375</b> | <b>0.234</b> | <b>0.370</b> | <b>0.233</b> |

Table A4: **Hyperparameter settings for different datasets.** Where,  $L_1$ ,  $L_2$  and  $L_3$  denote the number of layers used for the global temporal filter, local spatial filter, and global spatial filter, respectively.  $P$  is the patch length,  $D$  is the embedding dimension,  $H$  is the number of blocks,  $B$  is the batch size,  $R$  is the learning rate.

|             | $L_1$ | $L_2$ | $L_3$ | $P$ | $D$ | $H$ | $B$ | $R$                |
|-------------|-------|-------|-------|-----|-----|-----|-----|--------------------|
| ETTh1       | 3     | 0     | 0     | 16  | 128 | 16  | 256 | $2 \times 10^{-4}$ |
| ETTh2       | 3     | 0     | 0     | 16  | 128 | 16  | 256 | $2 \times 10^{-4}$ |
| ETTm1       | 3     | 0     | 0     | 16  | 128 | 16  | 128 | $1 \times 10^{-3}$ |
| ETTm2       | 3     | 0     | 0     | 16  | 128 | 16  | 128 | $1 \times 10^{-3}$ |
| Weather     | 3     | 0     | 0     | 16  | 128 | 16  | 64  | $1 \times 10^{-4}$ |
| Solar       | 2     | 2     | 0     | 16  | 128 | 16  | 64  | $5 \times 10^{-4}$ |
| Electricity | 3     | 0     | 3     | 16  | 256 | 16  | 32  | $5 \times 10^{-4}$ |
| Traffic     | 3     | 0     | 3     | 16  | 512 | 16  | 16  | $5 \times 10^{-4}$ |
| PeMS03      | 4     | 2     | 2     | 16  | 512 | 16  | 32  | $1 \times 10^{-3}$ |
| PeMS04      | 4     | 2     | 2     | 16  | 512 | 16  | 32  | $1 \times 10^{-3}$ |
| PeMS07      | 4     | 2     | 2     | 16  | 512 | 16  | 32  | $1 \times 10^{-3}$ |
| PeMS08      | 4     | 2     | 2     | 16  | 512 | 16  | 32  | $1 \times 10^{-3}$ |

## D ARCHITECTURE DETAILS

Table A5: **Comparison of different models based on their ability to capture temporal and spatial dependencies.**  $\checkmark$  indicates the ability is present, while  $\times$  indicates it is not.

| Model         | Local Temporal | Global Temporal | Local Spatial | Global Spatial |
|---------------|----------------|-----------------|---------------|----------------|
| DLinear       | $\times$       | $\checkmark$    | $\times$      | $\times$       |
| TiDE          | $\checkmark$   | $\checkmark$    | $\times$      | $\times$       |
| TimeMixer     | $\checkmark$   | $\checkmark$    | $\times$      | $\times$       |
| SOFTS         | $\times$       | $\checkmark$    | $\times$      | $\times$       |
| DUET          | $\checkmark$   | $\checkmark$    | $\times$      | $\checkmark$   |
| iTransformer  | $\times$       | $\checkmark$    | $\times$      | $\times$       |
| DeformableTST | $\checkmark$   | $\checkmark$    | $\times$      | $\times$       |
| Leddar        | $\checkmark$   | $\checkmark$    | $\times$      | $\checkmark$   |
| PatchTST      | $\checkmark$   | $\checkmark$    | $\times$      | $\times$       |
| Crossformer   | $\checkmark$   | $\checkmark$    | $\checkmark$  | $\times$       |
| ModernTCN     | $\checkmark$   | $\checkmark$    | $\checkmark$  | $\times$       |
| TimesNet      | $\checkmark$   | $\checkmark$    | $\times$      | $\times$       |
| FBM           | $\times$       | $\checkmark$    | $\times$      | $\times$       |
| FITS          | $\times$       | $\checkmark$    | $\times$      | $\times$       |
| FreMLP        | $\times$       | $\checkmark$    | $\times$      | $\checkmark$   |
| TiF (Ours)    | $\checkmark$   | $\checkmark$    | $\checkmark$  | $\checkmark$   |

## E OTHER RESULTS

Table A6: Full results for all models across eight long-term forecasting datasets. Best results are **bold** on a pale gold background; second-best are underlined on a light green background.

| Model       | TiF<br>Ours |       | iTransformer<br>(2023a) |       | DeformableTST<br>(2024a) |       | TimeMixer<br>(2024b) |       | PatchTST<br>(2023) |       | Crossformer<br>(2023) |       | Leddiam<br>(2024a) |       | ModernTCN<br>(2024b) |       | TimesNet<br>(2023) |       | DLinear<br>(2023) |       |       |
|-------------|-------------|-------|-------------------------|-------|--------------------------|-------|----------------------|-------|--------------------|-------|-----------------------|-------|--------------------|-------|----------------------|-------|--------------------|-------|-------------------|-------|-------|
| Metric      | MSE         | MAE   | MSE                     | MAE   | MSE                      | MAE   | MSE                  | MAE   | MSE                | MAE   | MSE                   | MAE   | MSE                | MAE   | MSE                  | MAE   | MSE                | MAE   | MSE               | MAE   |       |
| ETTm1       | 96          | 0.279 | 0.330                   | 0.300 | 0.353                    | 0.291 | 0.347                | 0.293 | 0.345              | 0.293 | 0.346                 | 0.310 | 0.361              | 0.294 | 0.347                | 0.292 | 0.346              | 0.338 | 0.375             | 0.299 | 0.343 |
|             | 192         | 0.322 | 0.356                   | 0.341 | 0.382                    | 0.325 | 0.372                | 0.335 | 0.372              | 0.333 | 0.370                 | 0.363 | 0.402              | 0.334 | 0.370                | 0.332 | 0.368              | 0.371 | 0.387             | 0.335 | 0.365 |
|             | 336         | 0.354 | 0.375                   | 0.374 | 0.398                    | 0.359 | 0.390                | 0.368 | 0.386              | 0.369 | 0.369                 | 0.389 | 0.430              | 0.392 | 0.425                | 0.365 | 0.391              | 0.410 | 0.411             | 0.369 | 0.386 |
|             | 720         | 0.409 | 0.408                   | 0.429 | 0.430                    | 0.418 | 0.423                | 0.426 | 0.417              | 0.416 | 0.420                 | 0.600 | 0.547              | 0.421 | 0.419                | 0.416 | 0.417              | 0.478 | 0.450             | 0.425 | 0.421 |
|             | Avg.        | 0.341 | 0.367                   | 0.362 | 0.391                    | 0.348 | 0.383                | 0.355 | 0.380              | 0.353 | 0.382                 | 0.420 | 0.435              | 0.354 | 0.381                | 0.351 | 0.381              | 0.400 | 0.406             | 0.357 | 0.379 |
| ETTm2       | 96          | 0.161 | 0.248                   | 0.175 | 0.266                    | 0.169 | 0.258                | 0.165 | 0.256              | 0.166 | 0.256                 | 0.263 | 0.359              | 0.174 | 0.260                | 0.166 | 0.256              | 0.187 | 0.267             | 0.167 | 0.260 |
|             | 192         | 0.218 | 0.285                   | 0.242 | 0.312                    | 0.229 | 0.299                | 0.225 | 0.298              | 0.223 | 0.296                 | 0.345 | 0.400              | 0.231 | 0.301                | 0.222 | 0.293              | 0.249 | 0.309             | 0.224 | 0.303 |
|             | 336         | 0.272 | 0.318                   | 0.282 | 0.340                    | 0.280 | 0.333                | 0.277 | 0.332              | 0.274 | 0.329                 | 0.469 | 0.496              | 0.288 | 0.336                | 0.272 | 0.324              | 0.321 | 0.351             | 0.281 | 0.342 |
|             | 720         | 0.352 | 0.371                   | 0.378 | 0.398                    | 0.349 | 0.384                | 0.360 | 0.387              | 0.362 | 0.385                 | 0.996 | 0.750              | 0.368 | 0.386                | 0.351 | 0.381              | 0.497 | 0.403             | 0.397 | 0.421 |
|             | Avg.        | 0.251 | 0.306                   | 0.269 | 0.329                    | 0.257 | 0.319                | 0.257 | 0.318              | 0.256 | 0.317                 | 0.518 | 0.501              | 0.265 | 0.320                | 0.253 | 0.314              | 0.291 | 0.333             | 0.267 | 0.332 |
| ETTh1       | 96          | 0.348 | 0.384                   | 0.386 | 0.408                    | 0.369 | 0.396                | 0.372 | 0.401              | 0.370 | 0.400                 | 0.386 | 0.426              | 0.377 | 0.394                | 0.368 | 0.394              | 0.384 | 0.402             | 0.375 | 0.399 |
|             | 192         | 0.391 | 0.409                   | 0.424 | 0.440                    | 0.410 | 0.417                | 0.413 | 0.430              | 0.413 | 0.429                 | 0.413 | 0.442              | 0.408 | 0.427                | 0.405 | 0.413              | 0.557 | 0.436             | 0.405 | 0.416 |
|             | 336         | 0.400 | 0.421                   | 0.419 | 0.460                    | 0.391 | 0.414                | 0.438 | 0.450              | 0.422 | 0.440                 | 0.440 | 0.461              | 0.424 | 0.437                | 0.391 | 0.412              | 0.491 | 0.469             | 0.439 | 0.443 |
|             | 720         | 0.432 | 0.453                   | 0.495 | 0.487                    | 0.447 | 0.464                | 0.486 | 0.484              | 0.447 | 0.468                 | 0.519 | 0.524              | 0.451 | 0.465                | 0.450 | 0.461              | 0.521 | 0.500             | 0.472 | 0.490 |
|             | Avg.        | 0.393 | 0.417                   | 0.439 | 0.448                    | 0.404 | 0.423                | 0.427 | 0.441              | 0.413 | 0.434                 | 0.440 | 0.463              | 0.415 | 0.430                | 0.404 | 0.420              | 0.458 | 0.450             | 0.423 | 0.437 |
| ETTh2       | 96          | 0.254 | 0.322                   | 0.297 | 0.348                    | 0.272 | 0.334                | 0.281 | 0.351              | 0.274 | 0.337                 | 0.611 | 0.557              | 0.283 | 0.345                | 0.263 | 0.332              | 0.340 | 0.374             | 0.289 | 0.353 |
|             | 192         | 0.317 | 0.362                   | 0.371 | 0.403                    | 0.325 | 0.369                | 0.349 | 0.387              | 0.314 | 0.382                 | 0.703 | 0.624              | 0.339 | 0.381                | 0.320 | 0.374              | 0.402 | 0.414             | 0.383 | 0.418 |
|             | 336         | 0.315 | 0.367                   | 0.404 | 0.428                    | 0.319 | 0.373                | 0.366 | 0.413              | 0.329 | 0.384                 | 0.827 | 0.675              | 0.366 | 0.405                | 0.313 | 0.376              | 0.452 | 0.452             | 0.448 | 0.465 |
|             | 720         | 0.379 | 0.421                   | 0.424 | 0.444                    | 0.395 | 0.433                | 0.401 | 0.436              | 0.379 | 0.422                 | 1.094 | 0.775              | 0.395 | 0.436                | 0.392 | 0.433              | 0.462 | 0.468             | 0.605 | 0.551 |
|             | Avg.        | 0.316 | 0.368                   | 0.374 | 0.406                    | 0.328 | 0.377                | 0.349 | 0.397              | 0.324 | 0.381                 | 0.809 | 0.658              | 0.345 | 0.391                | 0.322 | 0.379              | 0.414 | 0.427             | 0.431 | 0.447 |
| Weather     | 96          | 0.143 | 0.186                   | 0.159 | 0.208                    | 0.146 | 0.198                | 0.147 | 0.198              | 0.149 | 0.198                 | 0.146 | 0.212              | 0.149 | 0.200                | 0.149 | 0.200              | 0.172 | 0.220             | 0.152 | 0.237 |
|             | 192         | 0.189 | 0.231                   | 0.200 | 0.248                    | 0.191 | 0.239                | 0.192 | 0.243              | 0.194 | 0.241                 | 0.195 | 0.261              | 0.193 | 0.240                | 0.196 | 0.245              | 0.219 | 0.261             | 0.220 | 0.282 |
|             | 336         | 0.238 | 0.271                   | 0.233 | 0.280                    | 0.241 | 0.280                | 0.247 | 0.284              | 0.245 | 0.282                 | 0.252 | 0.311              | 0.241 | 0.279                | 0.238 | 0.277              | 0.280 | 0.306             | 0.265 | 0.319 |
|             | 720         | 0.311 | 0.327                   | 0.321 | 0.338                    | 0.310 | 0.331                | 0.318 | 0.330              | 0.314 | 0.334                 | 0.318 | 0.363              | 0.324 | 0.338                | 0.314 | 0.334              | 0.365 | 0.359             | 0.323 | 0.362 |
|             | Avg.        | 0.220 | 0.254                   | 0.233 | 0.271                    | 0.222 | 0.262                | 0.226 | 0.264              | 0.226 | 0.264                 | 0.228 | 0.287              | 0.226 | 0.264                | 0.224 | 0.264              | 0.259 | 0.287             | 0.240 | 0.300 |
| Electricity | 96          | 0.124 | 0.217                   | 0.138 | 0.237                    | 0.132 | 0.234                | 0.153 | 0.256              | 0.129 | 0.222                 | 0.135 | 0.237              | 0.134 | 0.228                | 0.129 | 0.226              | 0.168 | 0.272             | 0.140 | 0.237 |
|             | 192         | 0.142 | 0.236                   | 0.157 | 0.256                    | 0.148 | 0.248                | 0.168 | 0.269              | 0.147 | 0.240                 | 0.160 | 0.262              | 0.155 | 0.248                | 0.143 | 0.239              | 0.184 | 0.289             | 0.152 | 0.249 |
|             | 336         | 0.157 | 0.255                   | 0.167 | 0.264                    | 0.165 | 0.266                | 0.189 | 0.291              | 0.163 | 0.259                 | 0.182 | 0.282              | 0.173 | 0.268                | 0.161 | 0.259              | 0.198 | 0.300             | 0.169 | 0.267 |
|             | 720         | 0.186 | 0.283                   | 0.194 | 0.286                    | 0.197 | 0.296                | 0.228 | 0.320              | 0.197 | 0.290                 | 0.246 | 0.337              | 0.187 | 0.286                | 0.191 | 0.286              | 0.220 | 0.320             | 0.203 | 0.301 |
|             | Avg.        | 0.152 | 0.248                   | 0.164 | 0.261                    | 0.161 | 0.261                | 0.185 | 0.284              | 0.159 | 0.253                 | 0.181 | 0.279              | 0.162 | 0.256                | 0.156 | 0.253              | 0.192 | 0.295             | 0.166 | 0.264 |
| Traffic     | 96          | 0.328 | 0.213                   | 0.363 | 0.265                    | 0.355 | 0.261                | 0.369 | 0.257              | 0.360 | 0.249                 | 0.512 | 0.282              | 0.415 | 0.264                | 0.368 | 0.253              | 0.593 | 0.321             | 0.410 | 0.282 |
|             | 192         | 0.355 | 0.226                   | 0.385 | 0.273                    | 0.380 | 0.271                | 0.400 | 0.272              | 0.379 | 0.256                 | 0.501 | 0.273              | 0.445 | 0.277                | 0.379 | 0.261              | 0.617 | 0.336             | 0.423 | 0.287 |
|             | 336         | 0.378 | 0.236                   | 0.399 | 0.277                    | 0.393 | 0.281                | 0.407 | 0.272              | 0.392 | 0.264                 | 0.507 | 0.279              | 0.461 | 0.286                | 0.397 | 0.270              | 0.629 | 0.336             | 0.436 | 0.296 |
|             | 720         | 0.419 | 0.256                   | 0.445 | 0.312                    | 0.434 | 0.300                | 0.461 | 0.316              | 0.432 | 0.286                 | 0.571 | 0.301              | 0.489 | 0.305                | 0.440 | 0.296              | 0.640 | 0.350             | 0.466 | 0.315 |
|             | Avg.        | 0.370 | 0.233                   | 0.397 | 0.282                    | 0.391 | 0.278                | 0.409 | 0.279              | 0.391 | 0.264                 | 0.523 | 0.284              | 0.452 | 0.283                | 0.396 | 0.270              | 0.620 | 0.336             | 0.434 | 0.295 |
| Solar       | 96          | 0.151 | 0.192                   | 0.188 | 0.242                    | 0.165 | 0.238                | 0.179 | 0.232              | 0.178 | 0.229                 | 0.166 | 0.230              | 0.197 | 0.241                | 0.202 | 0.263              | 0.219 | 0.314             | 0.216 | 0.287 |
|             | 192         | 0.175 | 0.211                   | 0.193 | 0.258                    | 0.184 | 0.254                | 0.201 | 0.259              | 0.189 | 0.246                 | 0.186 | 0.237              | 0.231 | 0.264                | 0.223 | 0.279              | 0.231 | 0.322             | 0.244 | 0.305 |
|             | 336         | 0.191 | 0.220                   | 0.195 | 0.259                    | 0.191 | 0.263                | 0.190 | 0.256              | 0.198 | 0.249                 | 0.203 | 0.243              | 0.216 | 0.272                | 0.241 | 0.292              | 0.246 | 0.337             | 0.263 | 0.319 |
|             | 720         | 0.212 | 0.228                   | 0.223 | 0.281                    | 0.199 | 0.262                | 0.205 | 0.261              | 0.209 | 0.256                 | 0.210 | 0.256              | 0.250 | 0.281                | 0.247 | 0.292              | 0.280 | 0.363             | 0.264 | 0.324 |
|             | Avg.        | 0.182 | 0.213                   | 0.200 | 0.260                    | 0.185 | 0.254                | 0.193 | 0.252              | 0.194 | 0.245                 | 0.191 | 0.242              | 0.223 | 0.264                | 0.228 | 0.282              | 0.244 | 0.334             | 0.247 | 0.309 |

Table A7: Full results for all models across four short-term forecasting datasets. Best results are **bold** on a pale gold background; second-best are underlined on a light green background.

| Model  | TiF<br>(Ours) |              | DUET<br>(2025) |              | iTransformer<br>(2023a) |       | Leddiam<br>(2024a) |              | SOFTS<br>(2024a) |              | PatchTST<br>(2023) |       | Crossformer<br>(2023) |       | TimesNet<br>(2023) |       | TiDE<br>(2023) |       | DLinear<br>(2023) |       |       |
|--------|---------------|--------------|----------------|--------------|-------------------------|-------|--------------------|--------------|------------------|--------------|--------------------|-------|-----------------------|-------|--------------------|-------|----------------|-------|-------------------|-------|-------|
|        | MSE           | MAE          | MSE            | MAE          | MSE                     | MAE   | MSE                | MAE          | MSE              | MAE          | MSE                | MAE   | MSE                   | MAE   | MSE                | MAE   | MSE            | MAE   | MSE               | MAE   |       |
| PeMS03 | 12            | <b>0.059</b> | <b>0.159</b>   | <u>0.064</u> | 0.166                   | 0.071 | 0.174              | 0.068        | 0.174            | <u>0.064</u> | <u>0.165</u>       | 0.099 | 0.216                 | 0.090 | 0.203              | 0.085 | 0.192          | 0.178 | 0.305             | 0.122 | 0.243 |
|        | 24            | <b>0.077</b> | <b>0.181</b>   | <u>0.081</u> | <u>0.186</u>            | 0.093 | 0.201              | 0.094        | 0.202            | 0.083        | 0.188              | 0.142 | 0.259                 | 0.121 | 0.240              | 0.118 | 0.223          | 0.257 | 0.371             | 0.201 | 0.317 |
|        | 48            | <b>0.110</b> | <b>0.218</b>   | <u>0.114</u> | <u>0.222</u>            | 0.125 | 0.236              | 0.140        | 0.254            | <u>0.114</u> | 0.223              | 0.211 | 0.319                 | 0.202 | 0.317              | 0.155 | 0.260          | 0.379 | 0.463             | 0.333 | 0.425 |
|        | Avg.          | <b>0.082</b> | <b>0.186</b>   | <u>0.086</u> | <u>0.192</u>            | 0.096 | 0.204              | 0.101        | 0.210            | 0.087        | <u>0.192</u>       | 0.151 | 0.265                 | 0.138 | 0.253              | 0.119 | 0.271          | 0.271 | 0.380             | 0.219 | 0.295 |
| PeMS04 | 12            | <b>0.070</b> | <b>0.169</b>   | 0.079        | 0.181                   | 0.078 | 0.183              | 0.076        | 0.182            | <u>0.074</u> | <u>0.176</u>       | 0.105 | 0.224                 | 0.098 | 0.218              | 0.087 | 0.195          | 0.219 | 0.340             | 0.148 | 0.272 |
|        | 24            | <b>0.084</b> | <b>0.186</b>   | 0.096        | 0.203                   | 0.095 | 0.205              | 0.097        | 0.209            | <u>0.088</u> | <u>0.194</u>       | 0.153 | 0.257                 | 0.131 | 0.256              | 0.103 | 0.215          | 0.292 | 0.398             | 0.224 | 0.340 |
|        | 48            | <b>0.108</b> | <b>0.215</b>   | 0.114        | 0.226                   | 0.120 | 0.233              | 0.132        | 0.249            | <u>0.110</u> | <u>0.219</u>       | 0.229 | 0.339                 | 0.205 | 0.326              | 0.136 | 0.250          | 0.409 | 0.478             | 0.335 | 0.437 |
|        | Avg.          | <b>0.087</b> | <b>0.190</b>   | 0.096        | 0.203                   | 0.098 | 0.207              | 0.102        | 0.213            | <u>0.091</u> | <u>0.196</u>       | 0.162 | 0.273                 | 0.145 | 0.267              | 0.109 | 0.220          | 0.307 | 0.405             | 0.236 | 0.350 |
| PeMS07 | 12            | <b>0.055</b> | <b>0.145</b>   | <u>0.060</u> | <u>0.156</u>            | 0.067 | 0.165              | 0.066        | 0.164            | <u>0.057</u> | <u>0.152</u>       | 0.095 | 0.207                 | 0.094 | 0.200              | 0.082 | 0.181          | 0.173 | 0.304             | 0.115 | 0.242 |
|        | 24            | <b>0.066</b> | <b>0.158</b>   | <u>0.073</u> | <u>0.172</u>            | 0.088 | 0.190              | 0.079        | 0.185            | <u>0.073</u> | <u>0.173</u>       | 0.150 | 0.262                 | 0.139 | 0.247              | 0.101 | 0.204          | 0.271 | 0.383             | 0.210 | 0.329 |
|        | 48            | <b>0.085</b> | <b>0.180</b>   | <u>0.096</u> | <u>0.201</u>            | 0.110 | 0.215              | 0.115        | 0.228            | <u>0.096</u> | <u>0.195</u>       | 0.253 | 0.340                 | 0.311 | 0.369              | 0.134 | 0.238          | 0.446 | 0.495             | 0.398 | 0.458 |
|        | Avg.          | <b>0.069</b> | <b>0.161</b>   | 0.076        | 0.176                   | 0.088 | 0.190              | 0.087        | 0.192            | <u>0.075</u> | <u>0.173</u>       | 0.166 | 0.270                 | 0.181 | 0.272              | 0.106 | 0.208          | 0.297 | 0.394             | 0.241 | 0.343 |
| PeMS08 | 12            | <b>0.067</b> | <b>0.162</b>   | <u>0.072</u> | <u>0.168</u>            | 0.079 | 0.182              | <u>0.070</u> | 0.173            | 0.074        | 0.171              | 0.168 | 0.232                 | 0.165 | 0.214              | 0.112 | 0.212          | 0.227 | 0.343             | 0.154 | 0.276 |
|        | 24            | <b>0.084</b> | <b>0.181</b>   | 0.093        | <u>0.191</u>            | 0.115 | 0.219              | <u>0.091</u> | 0.200            | 0.104        | 0.201              | 0.224 | 0.281                 | 0.215 | 0.260              | 0.141 | 0.238          | 0.318 | 0.409             | 0.248 | 0.353 |
|        | 48            | <b>0.122</b> | <b>0.216</b>   | <u>0.123</u> | <u>0.217</u>            | 0.186 | 0.235              | 0.145        | 0.260            | 0.164        | 0.253              | 0.321 | 0.354                 | 0.315 | 0.335              | 0.198 | 0.283          | 0.437 | 0.501             | 0.440 | 0.470 |
|        | Avg.          | <b>0.091</b> | <b>0.186</b>   | <u>0.096</u> | <u>0.192</u>            | 0.127 | 0.212              | 0.102        | 0.211            | 0.114        | 0.208              | 0.238 | 0.289                 | 0.232 | 0.270              | 0.150 | 0.244          | 0.347 | 0.421             | 0.281 | 0.366 |

Table A8: **Full results across seven long-term forecasting datasets compared with other Fourier-based models.** Best results are **bold** on a pale gold background; second-best are underlined on a light green background.

| Dataset          |         | ETTh1              | ETTh2              | ETTh1              | ETTh2              | Weather            | Electricity        | Traffic            |
|------------------|---------|--------------------|--------------------|--------------------|--------------------|--------------------|--------------------|--------------------|
| Model            | Horizon | MSE MAE            |
| FreMLP<br>(2023) | 96      | 0.326 0.373        | 0.202 0.288        | 0.404 0.423        | 0.327 0.388        | 0.159 0.218        | 0.145 0.245        | 0.434 0.313        |
|                  | 192     | 0.359 0.392        | 0.250 0.322        | 0.461 0.460        | 0.428 0.450        | 0.207 0.270        | 0.158 0.255        | 0.471 0.311        |
|                  | 336     | 0.389 0.408        | 0.328 0.368        | 0.488 0.480        | 0.499 0.497        | 0.252 0.299        | 0.178 0.275        | 0.493 0.321        |
|                  | 720     | 0.445 0.441        | 0.431 0.436        | 0.566 0.553        | 0.727 0.637        | 0.319 0.342        | 0.220 0.315        | 0.535 0.339        |
|                  | Avg.    | 0.380 0.404        | 0.303 0.354        | 0.480 0.479        | 0.495 0.493        | 0.234 0.282        | 0.175 0.273        | 0.483 0.321        |
| FITS<br>(2023)   | 96      | 0.305 0.347        | 0.167 0.256        | <u>0.368 0.392</u> | <u>0.276 0.338</u> | <u>0.149 0.198</u> | 0.145 0.242        | 0.421 0.282        |
|                  | 192     | 0.338 0.366        | <u>0.222 0.293</u> | <u>0.404 0.412</u> | <u>0.336 0.377</u> | 0.196 0.244        | 0.158 0.253        | 0.435 0.288        |
|                  | 336     | 0.372 0.386        | <u>0.277 0.329</u> | 0.419 0.435        | <u>0.324 0.379</u> | 0.245 0.283        | 0.174 0.269        | 0.448 0.293        |
|                  | 720     | 0.427 <u>0.416</u> | 0.366 <u>0.382</u> | <u>0.431 0.458</u> | <u>0.373 0.416</u> | 0.321 0.338        | 0.213 0.301        | 0.478 0.310        |
|                  | Avg.    | 0.361 0.379        | <u>0.258 0.315</u> | <u>0.406 0.424</u> | <u>0.327 0.378</u> | 0.228 0.266        | 0.173 0.266        | 0.446 0.293        |
| FBM<br>(2024)    | 96      | <u>0.286 0.339</u> | <u>0.165 0.254</u> | <u>0.368 0.395</u> | 0.287 0.343        | 0.152 0.199        | <u>0.132 0.227</u> | <u>0.384 0.264</u> |
|                  | 192     | <b>0.324 0.365</b> | 0.225 0.296        | 0.408 0.418        | 0.351 0.386        | <u>0.194 0.242</u> | <u>0.149 0.243</u> | <u>0.399 0.269</u> |
|                  | 336     | <u>0.359 0.385</u> | <u>0.276 0.331</u> | 0.425 <u>0.430</u> | 0.352 0.394        | <u>0.244 0.282</u> | <u>0.167 0.261</u> | <u>0.419 0.282</u> |
|                  | 720     | <u>0.422 0.424</u> | <u>0.365 0.386</u> | 0.456 0.466        | 0.397 0.432        | <u>0.317 0.334</u> | <u>0.207 0.295</u> | <u>0.448 0.297</u> |
|                  | Avg.    | <u>0.348 0.378</u> | <u>0.258 0.317</u> | 0.414 0.427        | 0.347 0.389        | <u>0.227 0.264</u> | <u>0.164 0.257</u> | <u>0.412 0.278</u> |
| TIF<br>Ours      | 96      | <b>0.285 0.331</b> | <b>0.162 0.246</b> | <b>0.352 0.382</b> | <b>0.262 0.322</b> | <b>0.147 0.188</b> | <b>0.126 0.218</b> | <b>0.344 0.217</b> |
|                  | 192     | <u>0.325 0.356</u> | <b>0.218 0.285</b> | <b>0.402 0.412</b> | <b>0.318 0.359</b> | <b>0.190 0.232</b> | <b>0.143 0.236</b> | <b>0.370 0.229</b> |
|                  | 336     | <b>0.359 0.377</b> | <b>0.272 0.318</b> | <b>0.404 0.421</b> | <b>0.315 0.367</b> | <b>0.239 0.272</b> | <b>0.161 0.260</b> | <b>0.387 0.237</b> |
|                  | 720     | <b>0.418 0.410</b> | <b>0.352 0.371</b> | <b>0.436 0.458</b> | <b>0.386 0.422</b> | <b>0.311 0.327</b> | <b>0.193 0.291</b> | <b>0.429 0.260</b> |
|                  | Avg.    | <b>0.347 0.369</b> | <b>0.251 0.305</b> | <b>0.399 0.418</b> | <b>0.320 0.368</b> | <b>0.222 0.255</b> | <b>0.156 0.251</b> | <b>0.382 0.236</b> |
